# Supplementary material for: RNase H2 roles in genome integrity revealed by unlinking its activities
Source: PubMed Central journal article supplement — Nucleic Acids Res. 2013 Jan 25;41(5):3130–43. doi: 10.1093/nar/gkt027 (PMC3597693; doi:10.1093/nar/gkt027), 2013-01-25
Supplement: supp_gkt027_nar-03008-h-2012-File002.pdf [file supp_gkt027_nar-03008-h-2012-File002.pdf]

# **SUPPLEMENTARY DATA**

## **RNase H2 roles in genome integrity revealed by unlinking its activities**

Hyongi Chon<sup>1</sup>, Justin L. Sparks<sup>2</sup>, Monika P. Rychlik<sup>3</sup>, Marcin Nowotny<sup>3</sup>, Peter M. Burgers<sup>2</sup>,  
Robert J. Crouch<sup>1</sup> and Susana M. Cerritelli<sup>1</sup>

<sup>1</sup>Program in Genomics of Differentiation, Eunice Kennedy Shriver National Institute of Child Health and Human Development, National Institutes of Health, Bethesda, MD 20892, USA

<sup>2</sup>Department of Biochemistry and Molecular Biophysics, Washington University School of Medicine, St. Louis, MO 63110, USA

<sup>3</sup>Laboratory of Protein Structure, International Institute of Molecular and Cell Biology, 4 Trojdena Street, 02-109, Warsaw, Poland

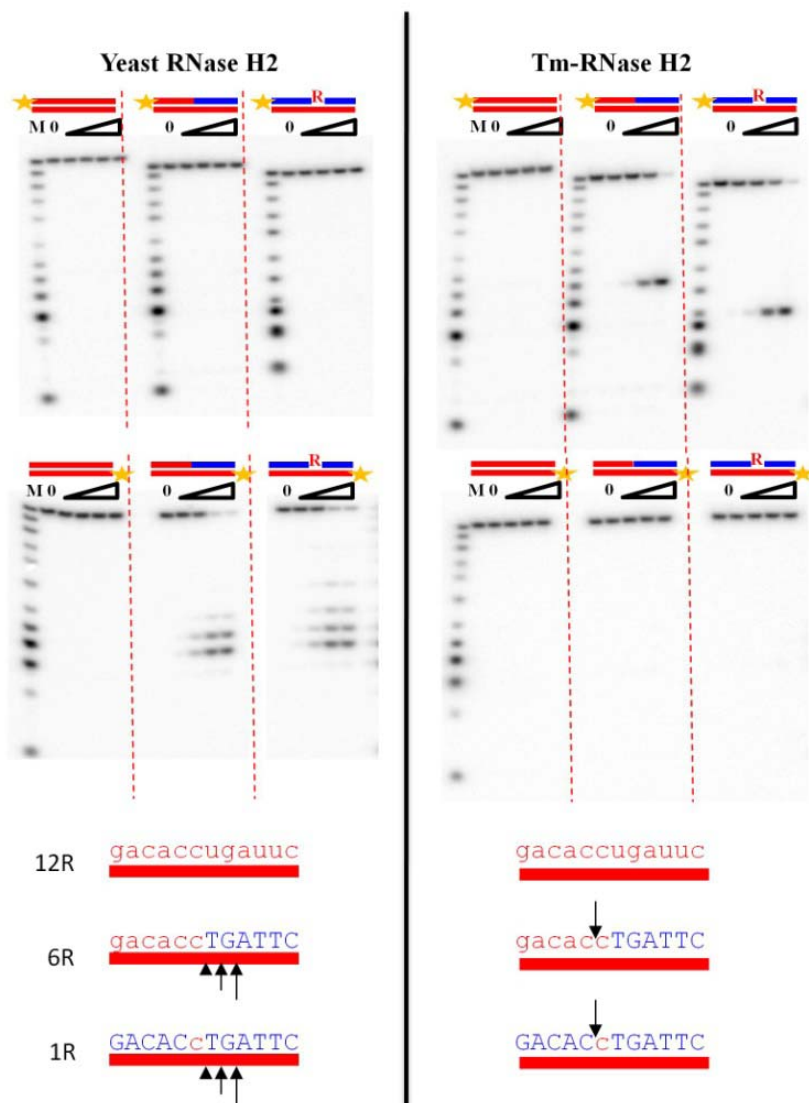

### Supplementary Figure S1. Cleavage of short substrates with yeast and Tm-RNases H2.

The 5'-<sup>32</sup>P labeled 12 mer substrates indicated above the gels were digested by Yeast and Tm-RNase H2 in the presence of 10 mM MgCl<sub>2</sub>. The lanes marked with 0 contained no enzyme, and lanes marked with triangle contained increasing amount of the proteins (0.16, 1.6, 16 and 160 nM in the case of Tm-RNase H2, 0.011, 0.11, 1.1 and 11 nM in the case of yeast RNase H2). Products of the hydrolysis were analyzed by 20% TBE-urea gels. The sizes of products were measured based on molecular size markers indicated as M (products of digestion of <sup>32</sup>P-labeled strands without complementary strand by phosphodiesterase I). Major cleavage sites are summarized on the bottom.

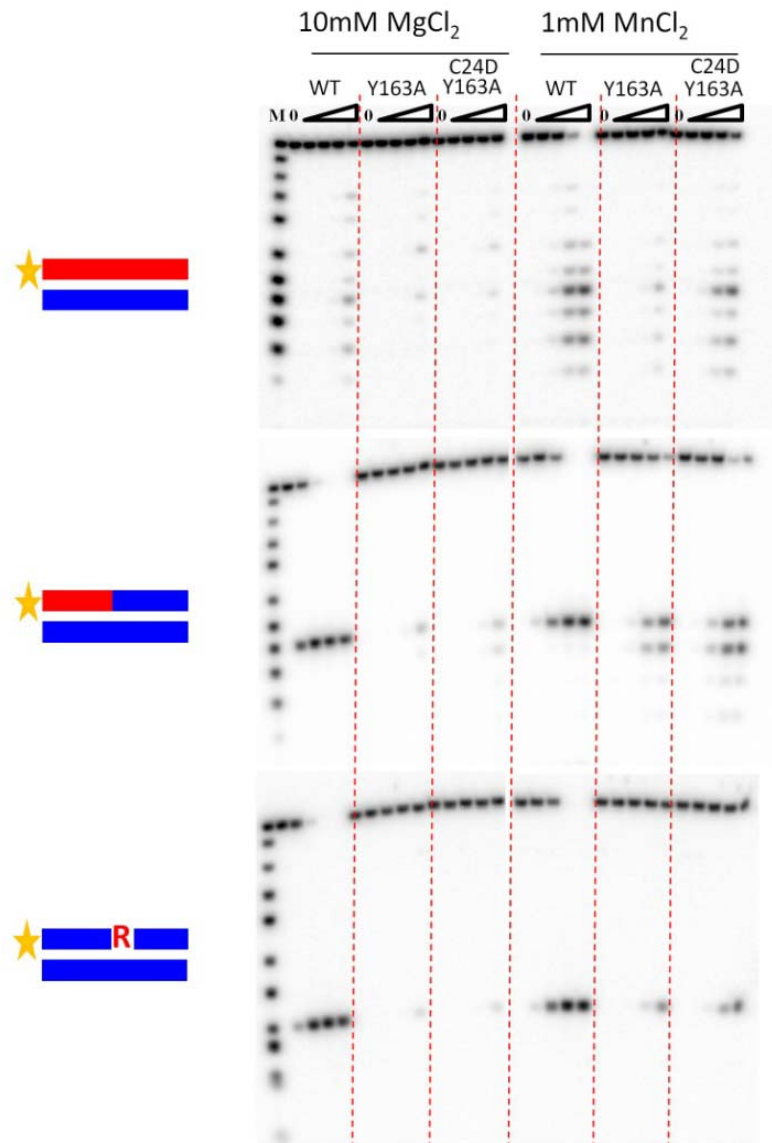

### Supplementary Figure S2. Effect of RNase H3-like double mutation in Tm-RNase H2.

The 5'-<sup>32</sup>P labeled 12 mer substrates schematically shown on the left of the gels were digested by Tm-RNase H2 WT, Y163A and C24D-Y163A mutants in the presence of 10 mM MgCl<sub>2</sub> and 1 mM MnCl<sub>2</sub>. The lanes marked with 0 contained no enzyme, and lanes marked with triangle contained increasing amount of the proteins (1.6, 16, 160 and 1600 nM). Products of the hydrolysis were analyzed by 20% TBE-urea gels. The sizes of products were measured based on molecular size markers indicated as M (products of digestion of <sup>32</sup>P-labeled strands without complementary strand by phosphodiesterase I).

A

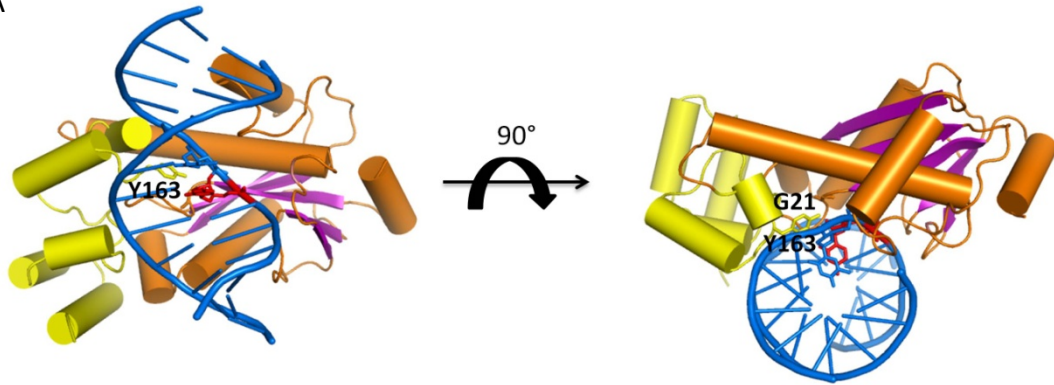

B

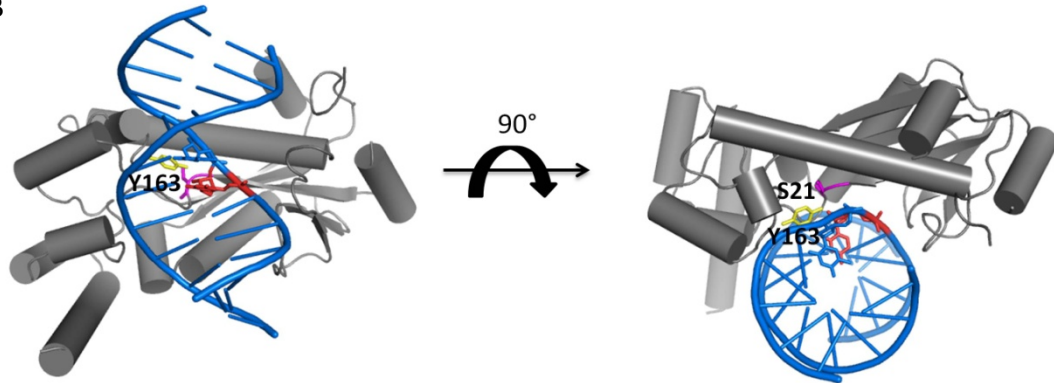

C

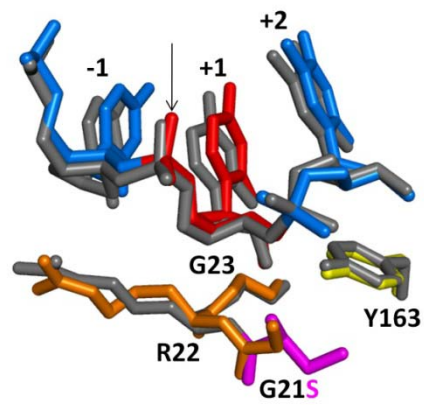

D

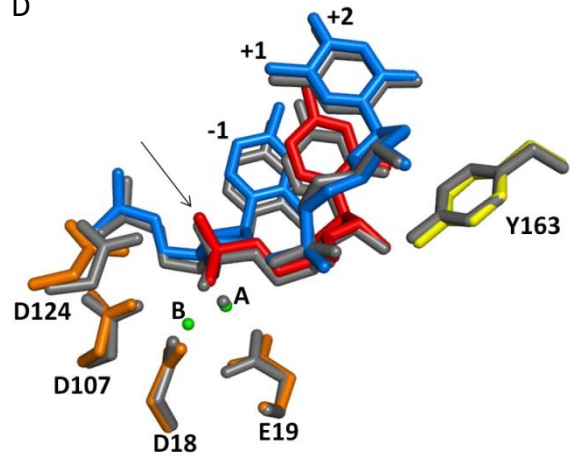

E

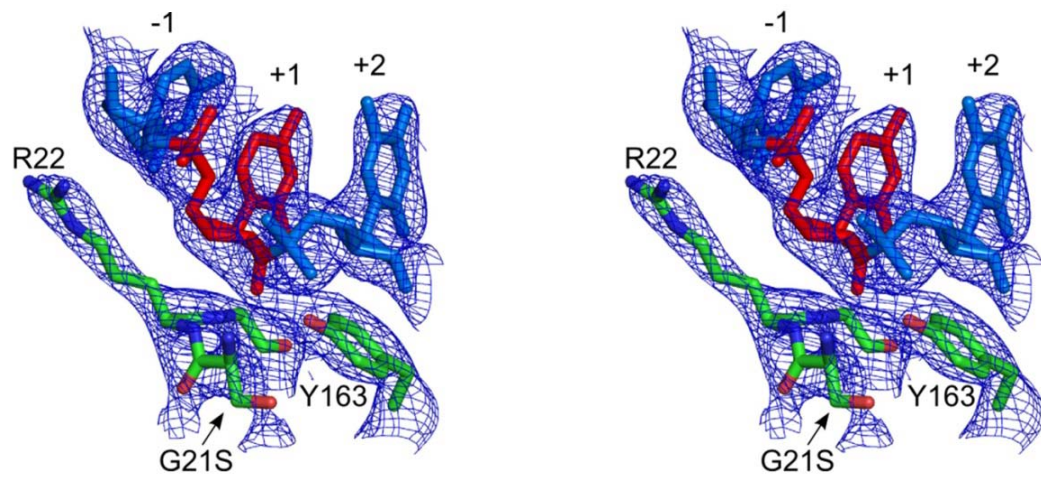

**Supplementary Figure S3. Crystal structure of Tm-RNase H2 G21S mutant in complex with DNA containing single ribonucleotide.**

Overall structures of wild-type and G21S mutant are shown. (A) N-terminal domain is colored with purple for beta-sheet and orange for loop and alpha-helix. C-terminal domain is in yellow. Residues (G21, K47 and Y163) and RpD junctions are shown in sticks. Cartoon model of the substrate is shown in blue for DNA and red for single ribonucleotide. (B) Protein structure except S21 (in purple), Y163 (in yellow) is shown in gray. (C) Close-up view for the recognition of RpD junction by Tm-RNase H2 WT and G21S mutant. G21S mutant is shown in gray except the G21S mutation (in magenta). The scissile phosphate is indicated with an arrow. (D) Close-up view for the correlation between the recognition of RpD junction by Y163 and catalysis. Structure of G21S mutant is shown in gray. Calcium ions of WT complex is shown in green. The scissile phosphate is indicated with an arrow. (E) Sample of electron density of the GRG(S) motif, Y163 and the RNA-DNA junction. The RNA is shown in red and DNA in blue. A 2Fo-Fc map contoured at 1.0 sigma is overlaid on the structure.

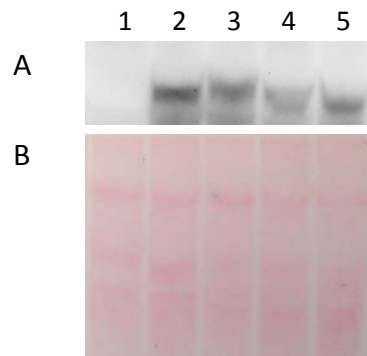

**Supplementary Figure S4. Expression of C-terminally FLAG-tagged RNase H2A from the plasmid, ycNPH2-FL2 and its variants**

(A) Yeast cells expressing C-terminally FLAG-tagged Rnh201 WT (lane 2), D39A (lane 3), G42S (lane 4), P45D-Y219A (lane 5) or no protein (lane 1) from the plasmids with Rnh201 gene flanked by its own native promoter were analyzed with western analysis using anti-FLAG M2 antibody. (B) The PVDF membrane for Figure S4A was stained with Ponceau-S.

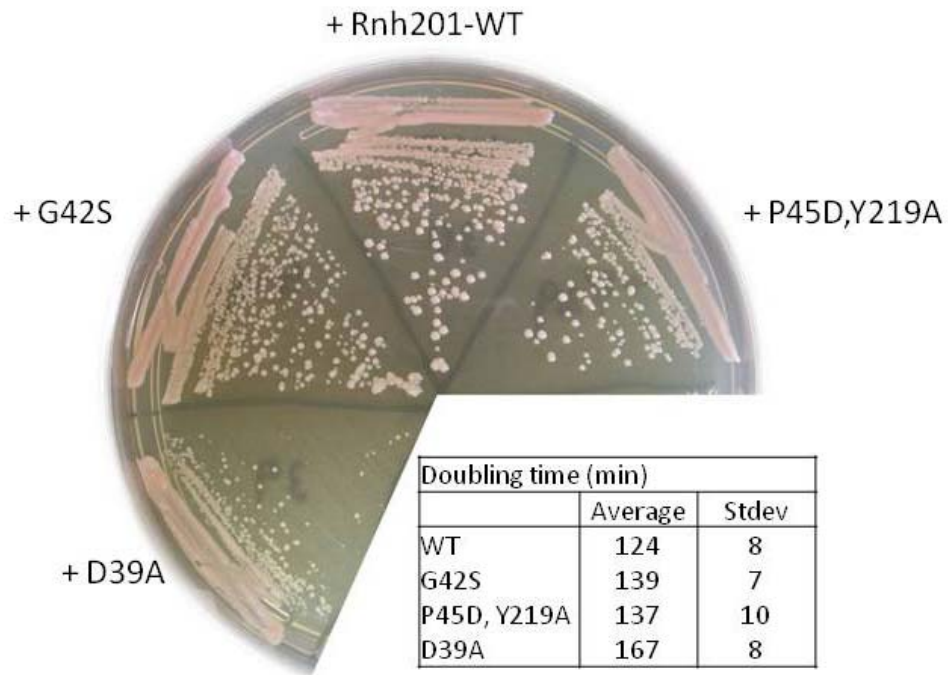

**Supplementary Figure S5. Complementation of slow growth phenotype of *sgs1Δ rnh201Δ* strain with plasmids.**

Transformants of *sgs1Δ rnh201Δ* strain with plasmids expressing Rnh201-WT, G42S, P45D-Y219A or D39A were streaked on YPD plate and cultured at 30°C. The table shows doubling time of the yeast strains analyzed in YPD medium.

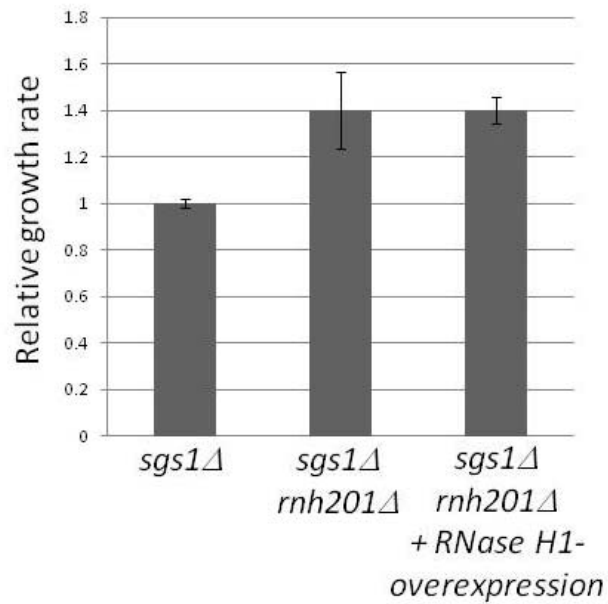

**Supplementary Figure S6. Effect of overexpression of RNase H1 on growth rate of *sgs1Δ rnh201Δ* strain.**

*sgs1Δ rnh201Δ* strain was transformed with a plasmid overexpressing Sc-RNase H1 and the doubling time was measured in YPD medium containing G418 at 30°C. The relative growth rate is shown.



Supplementary Table S1. List of yeast strains and plasmids

| Strain             | Genotype                                                                                                   | Source     |
|--------------------|------------------------------------------------------------------------------------------------------------|------------|
| W303-1A            | <i>MATa ade2-1 can1-100 his3-11,-15 leu2-3,112 trp1-1 ura3-1</i>                                           | (55)       |
| Cy8338             | W303-1A but <i>sgs1::HIS3</i>                                                                              | (56)       |
| SMC306             | W303-1A but <i>sgs1::HIS3 rnh201::HYG-URA3-GAL1-IsceI</i>                                                  | This study |
| SMC311             | W303 genotype but <i>sgs1::HIS3 Rnh201-D39A</i>                                                            | This study |
| SMC308             | W303 genotype but <i>sgs1::HIS3 Rnh201-G42S</i>                                                            | This study |
| SMC310             | W303 genotype but <i>sgs1::HIS3 Rnh201-P45D-Y219A</i>                                                      | This study |
| SMC307             | W303 genotype but <i>sgs1::HIS3 rnh202::HYG-URA3-GAL1-IsceI</i>                                            | This study |
| SMC314             | W303 genotype but <i>sgs1::HIS3 Rnh202-ΔPIP::KanMX</i>                                                     | This study |
| YAEH275            | <i>MATa his3Δ1 leu2Δ0 met15Δ0 ura3Δ0 P<sub>GAL1</sub>-3HA-TOP1 ::KanMx6 rnh201::NatMx6 rnh1::HphMx6</i>    | (40)       |
| Δ (-2) -7B-YUNI300 | <i>MATa CAN1 his7-2 leu2-Δ::kanMX ura3-Δ trip1-289 ade2-1 lys2-ΔGG28899-2900 pol2-M644G rnh201Δ::HYG-R</i> | (5)        |
| Plasmid            | Description                                                                                                | Source     |
| ycplac111          | LEU2, ARS/CEN                                                                                              | Novagen    |
| ycNPH2-FL2         | C-terminally FLAG-tagged Rnh201 flanked by its own native promoter in ycplac111                            | This study |
| pYX242-Kan         | LEU2, 2micro, KanMX4 at Sfol site                                                                          | Novagen    |
| pYX242-YH1-Kan     | Sc-Rnh1 was cloned under TPI promoter of pYX242, KanMX4 at Sfol site                                       | This study |

| Supplementary Table S2. Crystallographic data collection and refinement statistics for the Tm-RNase H2 G21S-substrate complex. |                          |
|--------------------------------------------------------------------------------------------------------------------------------|--------------------------|
| <b>Data collection</b>                                                                                                         |                          |
| Space group                                                                                                                    | C 2                      |
| Cell dimensions                                                                                                                |                          |
| <i>a</i> , <i>b</i> , <i>c</i> (Å)                                                                                             | 106.95, 47.63, 77.45     |
| <i>a</i> , <i>b</i> , <i>g</i> (°)                                                                                             | 90, 131.26, 90           |
| Wavelength (Å)                                                                                                                 | 0.91841                  |
| Resolution (Å)*                                                                                                                | 50.00 – 3.10 (3.15-3.10) |
| <i>R</i> <sub>merge</sub> (%)                                                                                                  | 14.6 (37.3)              |
| <i>I</i> / <i>s(I)</i>                                                                                                         | 9.8 (2.2)                |
| Completeness (%)                                                                                                               | 96.9 (76.3)              |
| Redundancy                                                                                                                     | 3.3 (2.2)                |
| <b>Refinement</b>                                                                                                              |                          |
| Resolution (Å)                                                                                                                 | 3.1                      |
| No. reflections                                                                                                                | 5022                     |
| <i>R</i> <sub>work</sub> / <i>R</i> <sub>free</sub> (%)                                                                        | 17.8/25.4                |
| No. atoms                                                                                                                      | 2189                     |
| Protein                                                                                                                        | 1676                     |
| Nucleic acids                                                                                                                  | 487                      |
| Ligands/ions                                                                                                                   | 2                        |
| Water                                                                                                                          | 24                       |
| Avg. <i>B</i> -factor                                                                                                          | 40.1                     |
| Protein                                                                                                                        | 38.7                     |
| Nucleic acids                                                                                                                  | 45.3                     |
| Ligands/ions                                                                                                                   | 35.9                     |
| Water                                                                                                                          | 30.3                     |
| Root-mean-square deviation                                                                                                     |                          |
| Bond lengths (Å)                                                                                                               | 0.009                    |
| Bond angles (°)                                                                                                                | 1.255                    |

\* Values in parentheses are for highest-resolution shell.

Supplementary Table S3. MolProbity.

|                       |                                                                               |        |                                                           |
|-----------------------|-------------------------------------------------------------------------------|--------|-----------------------------------------------------------|
| All-Atom Contacts     | Clashscore, all atoms:                                                        | 28.21  | 88 <sup>th</sup> percentile* (N=59, 2.85Å – 9999Å)        |
|                       | Clashscore is the number of serious steric overlaps (> 0.4 Å) per 1000 atoms. |        |                                                           |
| Protein Geometry      | Poor rotamers                                                                 | 8.67%  | Goal: <1%                                                 |
|                       | Ramachandran outliers                                                         | 0.46%  | Goal: <0.2%                                               |
|                       | Ramachandran favored                                                          | 93.52% | Goal: >98%                                                |
|                       | C $\beta$ deviations >0.25Å                                                   | 0      | Goal: 0                                                   |
|                       | MolProbity score <sup>^</sup>                                                 | 3.07   | 77 <sup>th</sup> percentile* (N=2114, 3.100Å $\pm$ 0.25Å) |
|                       | Residues with bad bonds:                                                      | 0.00%  | Goal: 0%                                                  |
|                       | Residues with bad angles:                                                     | 0.00%  | Goal: <0.1%                                               |
| Nucleic Acid Geometry | Bad backbone conformations <sup>#</sup> :                                     | 0      | Goal: 0                                                   |
|                       | Residues with bad bonds:                                                      | 0.00%  | Goal: 0%                                                  |
|                       | Residues with bad angles:                                                     | 0.00%  | Goal: <0.1%                                               |

All-atom structure was validated for macromolecular crystallography (5).

## REFERENCES

5. Nick McElhinny, S.A., Kumar, D., Clark, A.B., Watt, D.L., Watts, B.E., Lundström EB, Johansson, E., Chabes, A., and Kunkel, T.A. (2010). Genome instability due to ribonucleotide incorporation into DNA. *Nat. Chem. Biol.* **6**, 774-781.
40. El Hage, A., French, S.L., Beyer, A.L., and Tollervey, D. (2010). Loss of Topoisomerase I leads to R-loop-mediated transcriptional blocks during ribosomal RNA synthesis. *Genes Dev.* **24**, 1546-1558.
54. Thomas B.J. and Rothstein, R., (1989) Elevated recombination rates in transcriptionally active DNA. *Cell* **56**, 619-630.
55. Liberi, G., Maffioletti, G., Lucca, C., Chiolo, I., Baryshnikova, A., Cotta-Ramusino, C., Lopes, M., Pelliccioli, A., Haber, J.E., and Foiani, M. (2005). Rad51-dependent DNA structures accumulate at damaged replication forks in *sgs1* mutants defective in the yeast ortholog of BLM RecQ helicase. *Genes Dev.* **19**, 339-350.
56. Chen et al. (2010) MolProbity: all-atom structure validation for macromolecular crystallography. *Acta Crystallographica D* **66**:12-21.
